# Supplementary material
Source: PubMed Central journal article supplement (PMC3148296)
Supplement: NIHMS309130-supplement-1_si_001.pdf [file NIHMS309130-supplement-1_si_001.pdf]

## Supporting Information

### Conjugation of cRGD Peptide to Chlorophyll-a Based Photosensitizer (HPPH) Altered its Pharmacokinetics with Enhanced Tumor-Imaging and Photodynamic Efficacy

Avinash Srivatsan<sup>1</sup>, Manivannan Ethirajan<sup>1</sup>, Suresh K. Pandey<sup>1</sup>, Shipra Dubey<sup>1</sup>, Ting-Hsiu Liu<sup>3</sup>, Masayuki Shibata<sup>3</sup>, Joseph Missert<sup>1</sup>, Janet Morgan<sup>2</sup> and Ravindra K. Pandey<sup>1,\*</sup>

<sup>1</sup>Photodynamic Therapy Center, Cell Stress Biology and <sup>2</sup>Department of Dermatology, Roswell Park Cancer Institute, Buffalo, NY 14263. <sup>3</sup>Biomedical Informatics, Department of Health Informatics, University of Medicine & Dentistry of New Jersey – School of Health Related Professions, Newark, NJ 07107

### Contents

- Page S1: Title of the paper, authors along with the contents  
Page S2-4: Synthetic procedure and copies of <sup>1</sup>H NMR spectra of selective compounds  
Page S4-5: HPLC Chromatograms of selective compounds  
Page S6: *In vitro* photosensitizing efficacy of HPPH and its peptide conjugates in 4T1 cells  
Page S6: *In vitro* uptake of HPPH and its peptide conjugates in U87 and 4T1 cells  
Page S7: False color images showing localization of conjugate **7** in 4T1 cells.

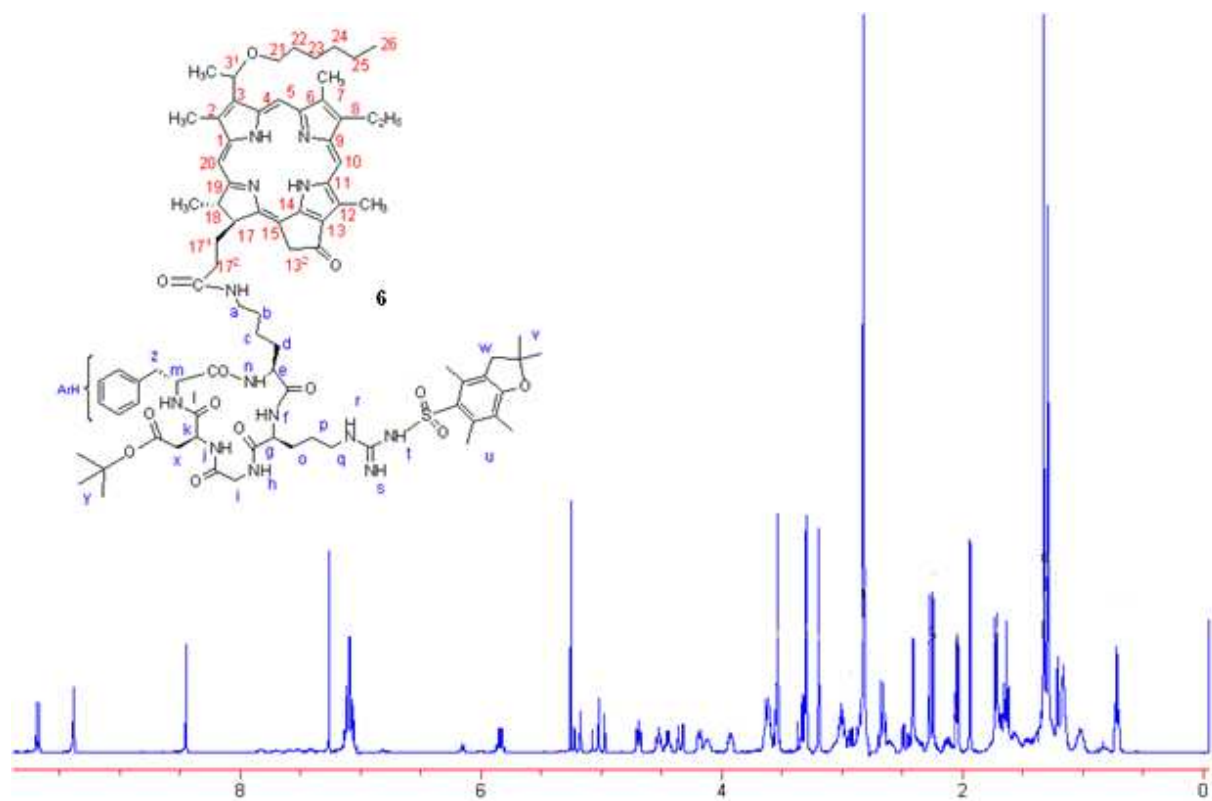

Figure 1

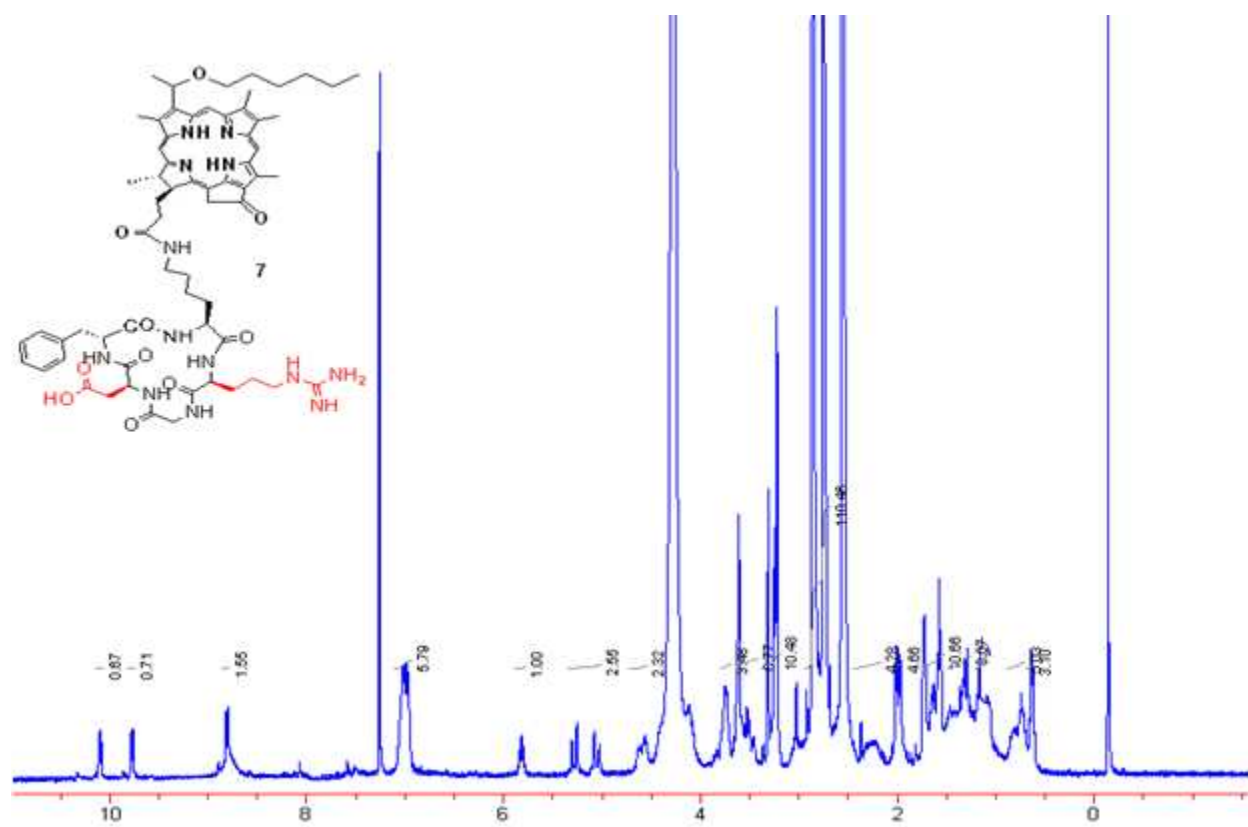

Figure 2

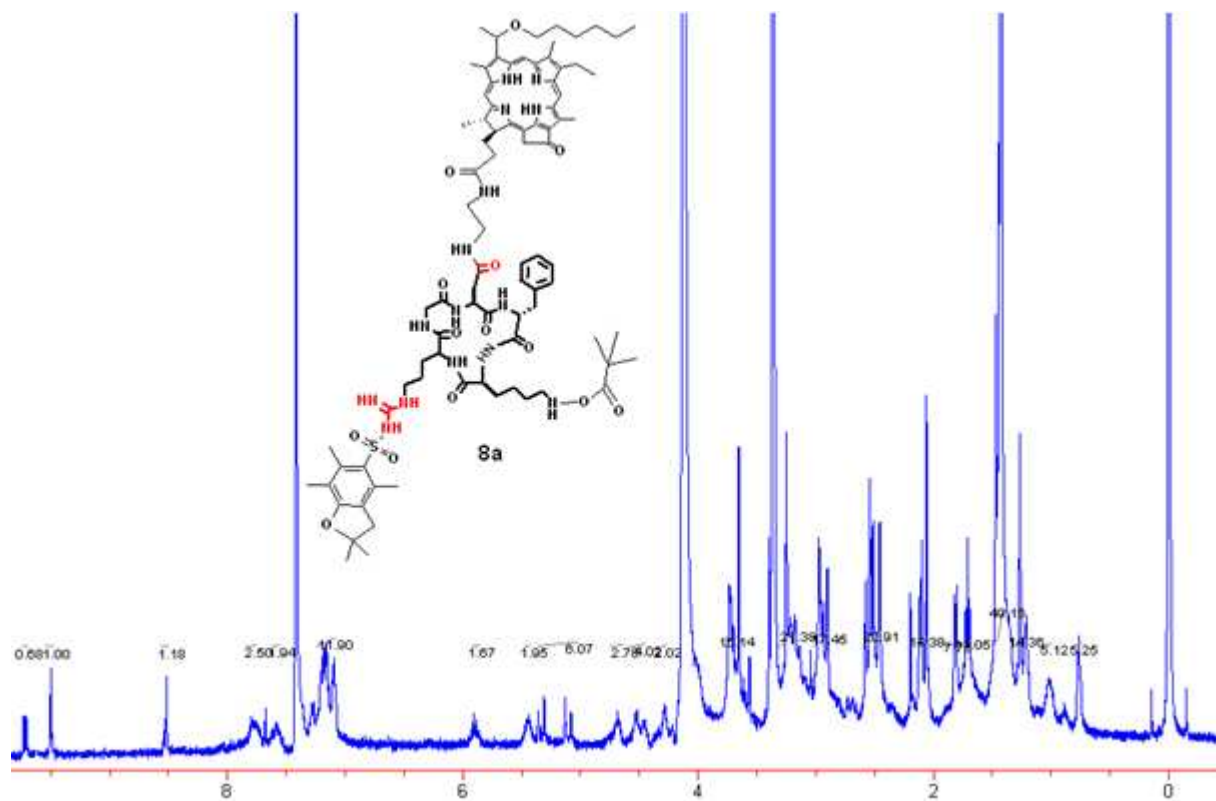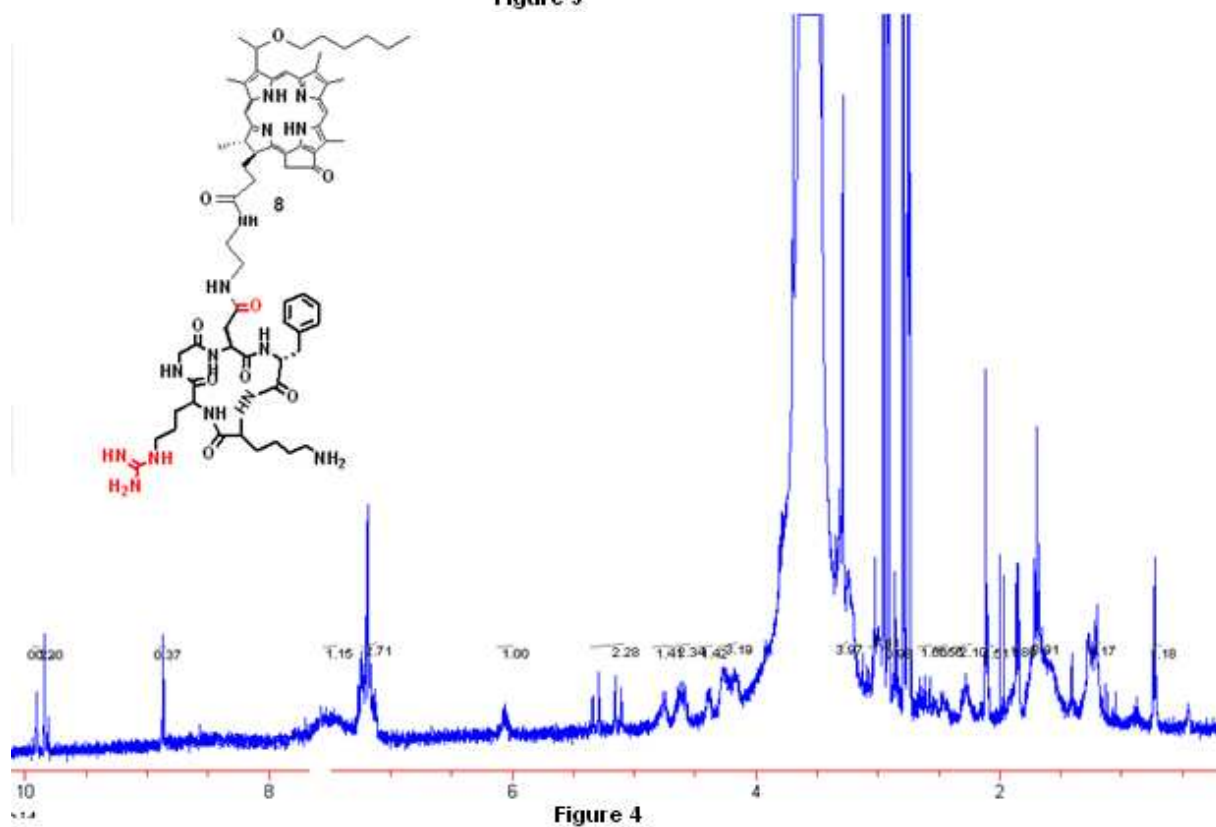

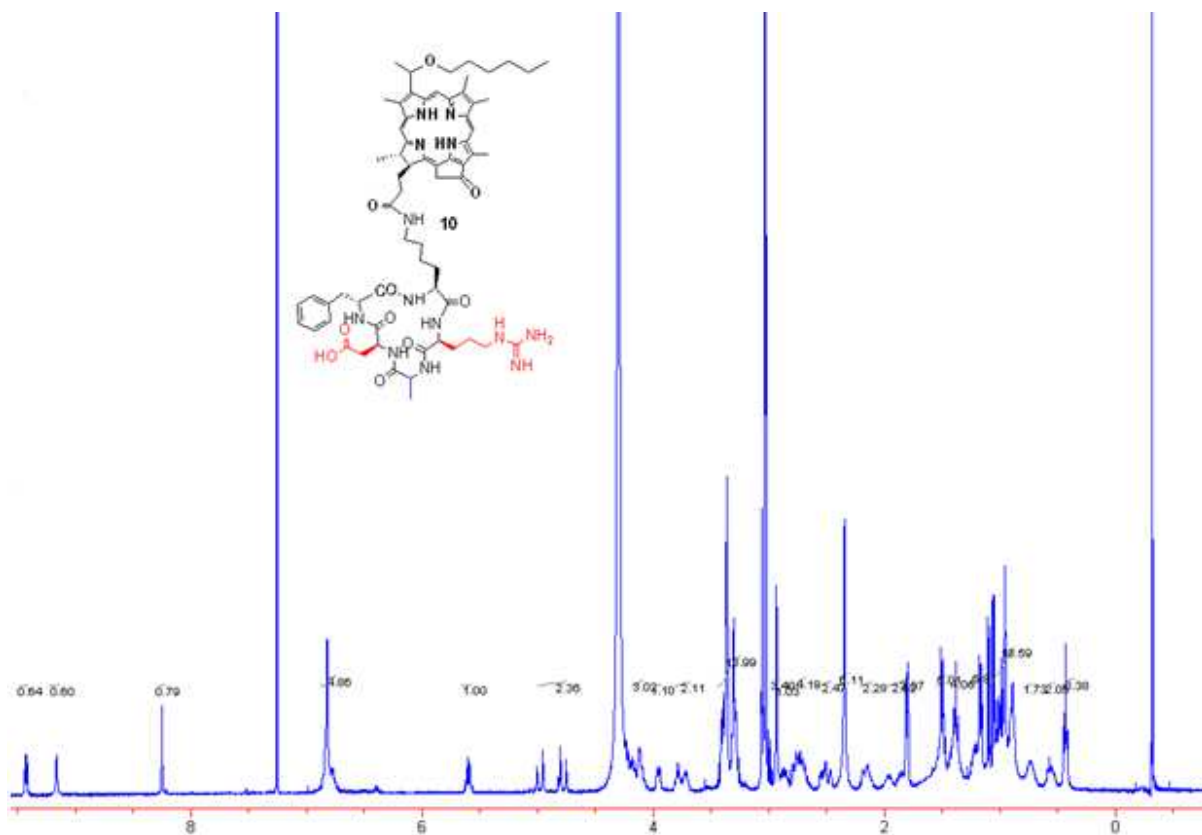

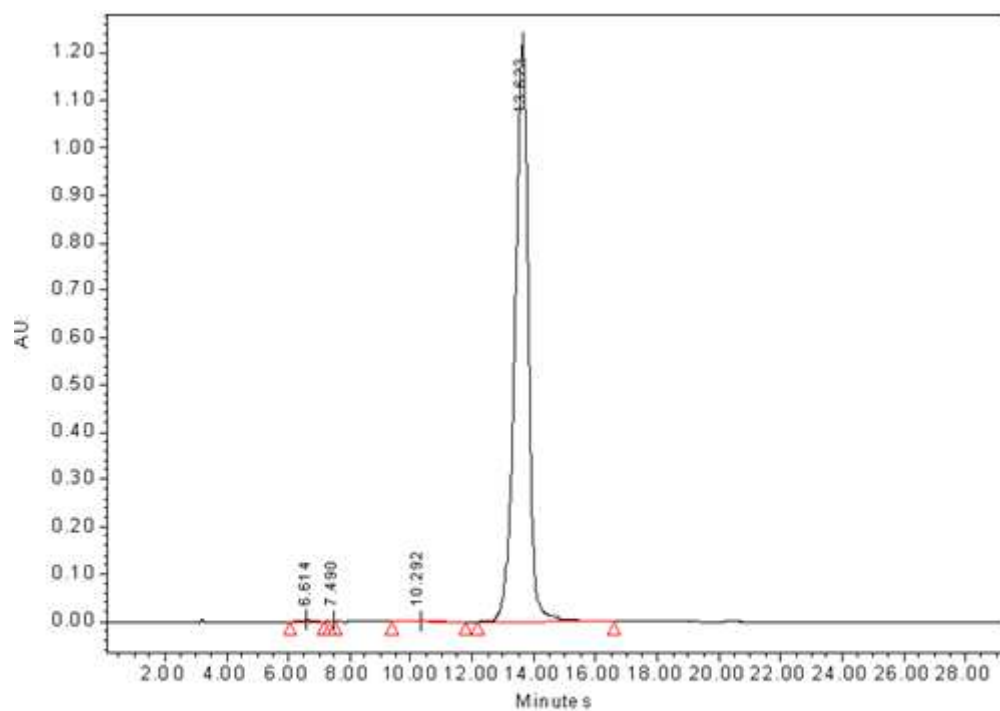

HPLC Chromatogram of Compound 8a

Figure 7

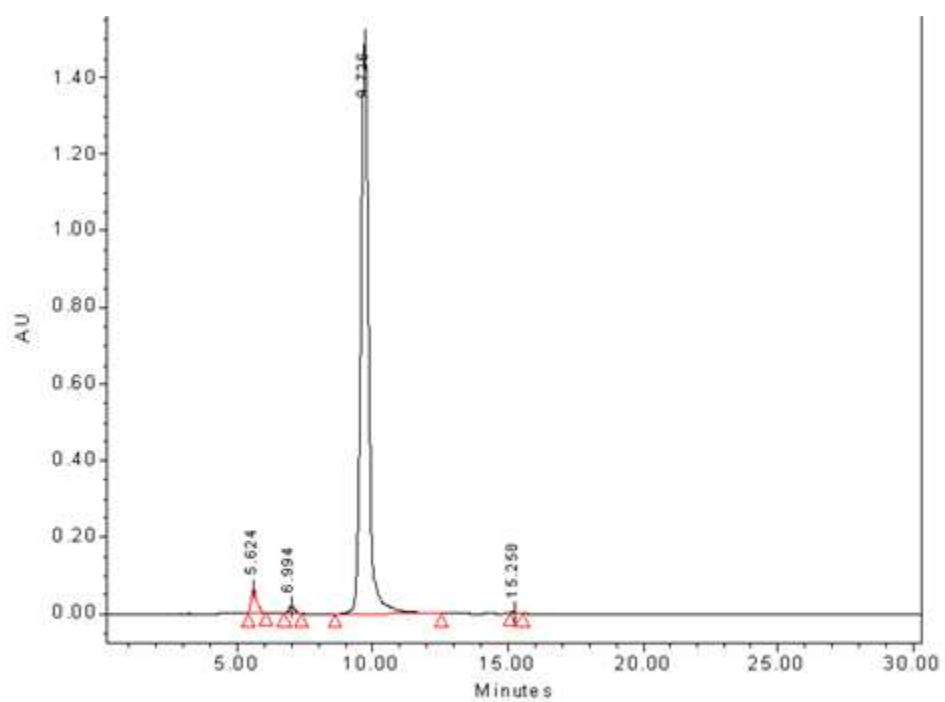

HPLC Chromatogram of Compound 10

Figure 8

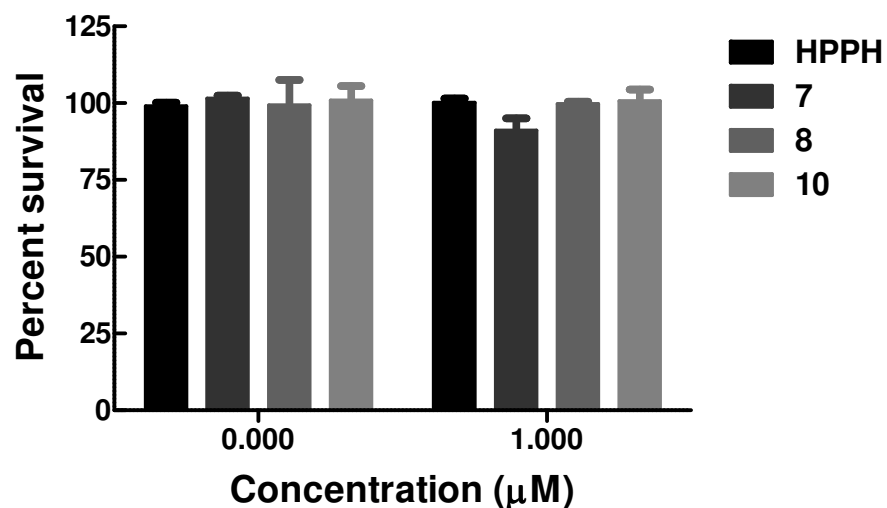

**Figure 9:** *In vitro* photosensitizing efficacy of HPPH and its peptide conjugates **7**, **8** and **10** at 0 (no photosensitizer) and 1 µM concentration under dark conditions (not exposed to light)

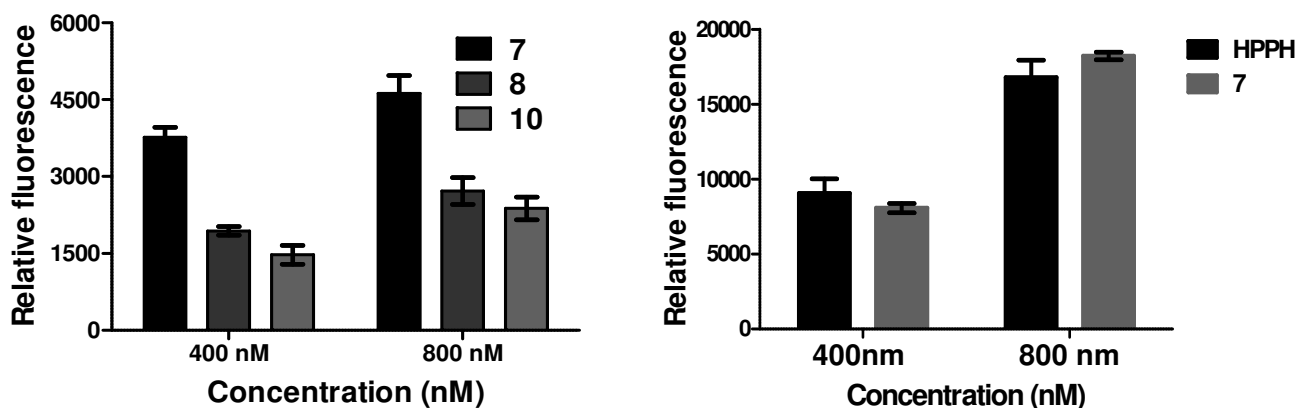

**Figure 10:** *In vitro* uptake of HPPH and the corresponding peptide conjugates **7**, **8** and **10** in two concentrations (400 nM and 800 nM) in U87 cells at **(A)** 4h and **(B)** Uptake of HPPH and conjugate **7** in two concentrations (400 and 800nm) in U87 cells 2h post-incubation, measured by flow cytometry.

7

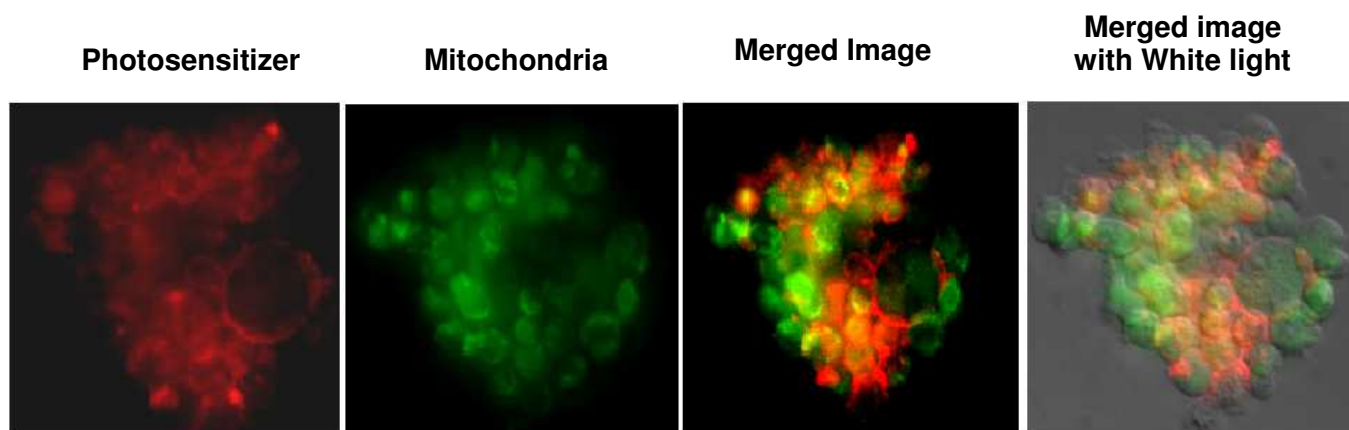

**Figure 11:** Enlarged image showing localization of HPPH-cRGD conjugate **7** in 4T1 cells. There is visible localization in the cell membrane post incubation with compound **7**.
